# Supplementary material for: No Reduction of Atherosclerosis in C-reactive Protein (CRP)-deficient Mice
Source: PubMed Central journal article supplement — J Biol Chem. 2010 Dec 11;286(8):6272–9. doi: 10.1074/jbc.M110.161414 (PMC3057833; doi:10.1074/jbc.m110.161414), 2010-12-11
Supplement: supp_M110.161414_jbc.M110.161414-1.pdf [file supp_M110.161414_jbc.M110.161414-1.pdf]

### Supplemental Data

(Teupser et al.: *No reduction of atherosclerosis in C-reactive protein (CRP)-deficient mice*)

**Supplemental Table S1:** Composition and ingredients of low-fat, semi-synthetic diet

| Composition               | % Weight | % Cal    |
|---------------------------|----------|----------|
| Protein                   | 19.2     | 20       |
| Carbohydrate              | 67.3     | 70       |
| Fat                       | 4.3      | 10       |
| Cholesterol               | 0.02     | 0        |
| Ingredients               | % Weight | Cal/gram |
| Casein, alcohol extracted | 19.0     | 758      |
| L-Cystine                 | 0.28     | 11       |
| Sucrose                   | 19.0     | 758      |
| Corn starch               | 47.4     | 1895     |
| Cellulose, BW200          | 4.7      | 0        |
| Soybean oil               | 2.37     | 213      |
| Cocoa butter              | 1.9      | 171      |
| Mineral mix S10021        | 0.95     | 0        |
| Dicalcium phosphate       | 1.23     | 0        |
| Calcium carbonate         | 0.52     | 0        |
| Potassium citrate         | 1.56     | 0        |
| Vitamin mix V10001        | 0.95     | 38       |
| Choline bitartrate        | 0.19     | 0        |
| Cholesterol               | 0.02     | 0        |

Calculations are based on estimated metabolizable energy of 4kcal/g (16.7 kJ/g) of protein and carbohydrate and 9 kcal/g (37.7 kJ/g) of lipid. Concentrations of minerals, vitamins and fiber were adjusted to maintain a constant ratio to energy.

**Supplemental Table S2: Antibodies and dilutions for immunohistochemistry**

|                      | Antibody description/<br>clone number | Host, Isotype          | Dilution  | Supplier, catalogue number |
|----------------------|---------------------------------------|------------------------|-----------|----------------------------|
| Primary antibodies   | CD68, FA-11                           | Rat, IgG <sub>2a</sub> | 1:10      | AbD Serotec, MCA1957       |
|                      | Complement C3, 11H9                   | Rat, IgG <sub>2a</sub> | 1:50      | Abcam, ab11862             |
|                      | $\alpha$ -SMA                         | Rabbit, IgG            | 1:200     | Abcam, ab5694              |
| Secondary antibodies | Anti-rat-HRP-conjugated               | Goat, IgG              | 1:50      | AbD Serotec, STAR72        |
|                      | Anti-rabbit-HRP-conjugated            | ImmPRESS Reagent, Ig   | Undiluted | VECTOR Laboratories        |

Abcam, Cambridge, UK; AbD Serotec, Oxford, UK; Vector Laboratories; VECTOR Laboratories, Burlingame, Canada

**Supplemental Table S3: Effect of CRP-deficiency on lipids and lipoproteins in ApoE<sup>-/-</sup> and LDLR<sup>-/-</sup> mice**

**ApoE<sup>-/-</sup> mice at 16 weeks of age:**

| Gender  | Parameter               | CRP <sup>+/+</sup> | CRP <sup>+/-</sup>  | CRP <sup>-/-</sup>   |
|---------|-------------------------|--------------------|---------------------|----------------------|
| males   | Cholesterol (mg/dL)     | 425 ± 169          | 451 ± 123           | 513 ± 111            |
|         | Triglycerides (mg/dL)   | 192 ± 166          | 199 ± 134           | 145 ± 95             |
|         | HDL-cholesterol (mg/dL) | 25 ± 7             | 22 ± 6              | 19 ± 4               |
| females | Cholesterol (mg/dL)     | 508 ± 107          | 457 ± 79            | 458 ± 73             |
|         | Triglycerides (mg/dL)   | 128 ± 52           | 120 ± 80            | 94 ± 39              |
|         | HDL-cholesterol (mg/dL) | 20 ± 4*            | 19 ± 4 <sup>§</sup> | 14 ± 3* <sup>§</sup> |

\* p<0.001 CRP<sup>+/+</sup> vs. CRP<sup>-/-</sup>, <sup>§</sup> p<0.01 CRP<sup>+/-</sup> vs. CRP<sup>-/-</sup>.

**ApoE<sup>-/-</sup> mice at 12 weeks of age:**

| Gender  | Parameter               | CRP <sup>+/+</sup>     | CRP <sup>+/-</sup>    | CRP <sup>-/-</sup>  |
|---------|-------------------------|------------------------|-----------------------|---------------------|
| males   | Cholesterol (mg/dL)     | 414 ± 102              | 448 ± 52              | 474 ± 80            |
|         | Triglycerides (mg/dL)   | 178 ± 63               | 151 ± 89              | 143 ± 96            |
|         | HDL-cholesterol (mg/dL) | 24 ± 11                | 20 ± 4                | 27 ± 9              |
| females | Cholesterol (mg/dL)     | 456 ± 162              | 438 ± 81              | 427 ± 65            |
|         | Triglycerides (mg/dL)   | 225 ± 98* <sup>§</sup> | 102 ± 58 <sup>§</sup> | 104 ± 80*           |
|         | HDL-cholesterol (mg/dL) | 14 ± 5 <sup>†#</sup>   | 22 ± 4 <sup>†</sup>   | 21 ± 6 <sup>#</sup> |

\* p<0.01 CRP<sup>+/+</sup> vs. CRP<sup>-/-</sup>, <sup>§</sup> p<0.05 CRP<sup>+/-</sup> vs. CRP<sup>-/-</sup>, <sup>†</sup> p<0.05 CRP<sup>+/+</sup> vs. CRP<sup>+/-</sup>,  
<sup>#</sup> p<0.05 CRP<sup>+/+</sup> vs. CRP<sup>-/-</sup>.

**LDLR<sup>-/-</sup> mice at 20 weeks of age:**

| Gender  | Parameter                | CRP <sup>+/+</sup>     | CRP <sup>+/-</sup>   | CRP <sup>-/-</sup>     |
|---------|--------------------------|------------------------|----------------------|------------------------|
| males   | Cholesterol (mg/dL)      | 419 ± 102*             | 515 ± 230            | 564 ± 158*             |
|         | Triglycerides (mg/dL)    | 198 ± 107 <sup>§</sup> | 289 ± 143            | 327 ± 134 <sup>§</sup> |
|         | VLDL-cholesterol (mg/dL) | 22 ± 23* <sup>†</sup>  | 58 ± 56 <sup>†</sup> | 68 ± 31*               |
|         | LDL-cholesterol (mg/dL)  | 296 ± 122*             | 391 ± 183            | 460 ± 122*             |
|         | HDL-cholesterol (mg/dL)  | 79 ± 14                | 83 ± 41              | 85 ± 21                |
| females | Cholesterol (mg/dL)      | 527 ± 175              | 612 ± 135            | 615 ± 207              |
|         | Triglycerides (mg/dL)    | 188 ± 75               | 263 ± 83             | 212 ± 85               |
|         | VLDL-cholesterol (mg/dL) | 88 ± 59                | 126 ± 48             | 124 ± 100              |
|         | LDL-cholesterol (mg/dL)  | 369 ± 73               | 454 ± 79             | 431 ± 134              |
|         | HDL-cholesterol (mg/dL)  | 46 ± 19                | 49 ± 18              | 46 ± 24                |

• p<0.01 CRP<sup>+/+</sup> vs. CRP<sup>-/-</sup>, <sup>§</sup> p<0.05 CRP<sup>+/+</sup> vs. CRP<sup>-/-</sup>, <sup>†</sup> p<0.05 CRP<sup>+/+</sup> vs. CRP<sup>+/-</sup>,

**Supplemental Table S4:** Effect of genotype on lesion size in male LDLR<sup>-/-</sup> mice with and without adjustment to lipid parameters (total cholesterol, total triglycerides, LDL-cholesterol, VLDL-cholesterol).

| Anatomical site | Adjustment for lipid parameters | CRP Genotype (males on LDLR <sup>-/-</sup> background) |                       |                         |                       |                         |                       | Overall p-value (ANOVA) |
|-----------------|---------------------------------|--------------------------------------------------------|-----------------------|-------------------------|-----------------------|-------------------------|-----------------------|-------------------------|
|                 |                                 | +/+                                                    |                       | -/+                     |                       | -/-                     |                       |                         |
|                 |                                 | Mean (μm <sup>2</sup> )                                | SD (μm <sup>2</sup> ) | Mean (μm <sup>2</sup> ) | SD (μm <sup>2</sup> ) | Mean (μm <sup>2</sup> ) | SD (μm <sup>2</sup> ) |                         |
| BCA             | no                              | 4187                                                   | 3895                  | 7669                    | 15631                 | 8535                    | 9341                  | 0.566                   |
|                 | yes                             | 7883                                                   | 5921                  | 5501                    | 6908                  | 6994                    | 6892                  | 0.234                   |
| Aortic root     | no                              | 61443                                                  | 34089                 | 84372                   | 40604                 | 83150                   | 45282                 | 0.662                   |
|                 | yes                             | 68113                                                  | 25328                 | 80976                   | 33104                 | 78747                   | 34266                 | 0.512                   |
